# Supplementary material
Source: PubMed Central journal article supplement (PMC3014690)
Supplement: supp_10-0413_Online_Supplement.pdf [file supp_10-0413_Online_Supplement.pdf]

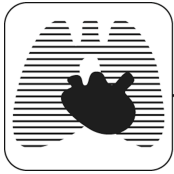

### Sarcoidosis in Black Women in the United States

#### Data From the Black Women's Health Study

*Yvette C. Cozier, DSc; Jeffrey S. Berman, MD; Julie R. Palmer, ScD; Deborah A. Boggs, MS;  
David M. Serlin, MD; and Lynn Rosenberg, ScD*

#### e-Appendix 1.

#### BLACK WOMEN'S HEALTH STUDY SARCOIDOSIS QUESTIONNAIRE FOR PHYSICIANS

1. **How certain is the diagnosis of sarcoidosis?** Definite \_\_\_\_ Possible \_\_\_\_ Not Sarcoidosis \_\_\_\_
2. **Date of Diagnosis** Month \_\_\_\_\_ Year \_\_\_\_\_
3. **When did the patient first develop symptoms?** Year \_\_\_\_\_ Not known to me \_\_\_\_\_
4. **What were the presenting symptoms?** Shortness of breath \_\_\_\_ Chest pain \_\_\_\_ Screening CXR \_\_\_\_  
Skin disease \_\_\_\_ Other: \_\_\_\_\_
5. **What is the organ involvement of sarcoidosis?** Lung \_\_\_\_ Intrathoracic lymph nodes \_\_\_\_ CNS \_\_\_\_  
Eye \_\_\_\_ Heart \_\_\_\_ Liver \_\_\_\_ Face (Lupus Pernio) \_\_\_\_ Skin (not lupus pernio) \_\_\_\_ Other  
(specify): \_\_\_\_\_
6. **Sarcoidosis course:** Never with symptoms \_\_\_\_ Acute illness (with resolution) \_\_\_\_  
\_\_\_\_ Chronic/stable \_\_\_\_ Chronic/progressive \_\_\_\_

*Online supplements are not copyedited prior to posting.*

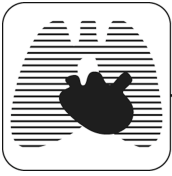

**7. Diagnostic Tests (check all that apply):**

**Findings**

|                            | <b>Normal</b> | <b>Abnormal</b>                                                                | <b><u>Comments:</u></b> |
|----------------------------|---------------|--------------------------------------------------------------------------------|-------------------------|
| 1. Chest X-ray             | _____         | Stage: _____<br>Enlarged lymph nodes: _____<br>Nodules _____ Infiltrates _____ | _____                   |
| 2. Chest CT                | _____         | Fibrosis _____                                                                 | _____                   |
| 3. Serum ACE               | _____         | Increased _____ Value _____                                                    | _____                   |
| 4. PPD Status              | _____         | Positive _____ Unknown _____                                                   | _____                   |
| 5. Gallium Scan            | _____         | Panda/Lambda _____ Other _____                                                 | _____                   |
| 6. Biopsy<br>(site: _____) | _____         | Consistent with Sarcoidosis _____                                              | _____                   |
| 7. Other:<br>_____         | _____         | _____                                                                          | _____                   |

**8. Treatment (check all that apply):**

**Duration**

|                  |       |       |
|------------------|-------|-------|
| Prednisone       | _____ | _____ |
| Methotrexate     | _____ | _____ |
| Plaquenil        | _____ | _____ |
| Inhaled steroids | _____ | _____ |
| Nasal steroids   | _____ | _____ |
| Other:<br>_____  | _____ | _____ |

**9. Co-Morbid Illness?:** Yes \_\_\_\_\_ No \_\_\_\_\_ If yes, specify: \_\_\_\_\_

**10. What is your primary specialty?**

Pulmonology \_\_\_\_\_ Internal Medicine \_\_\_\_\_ Rheumatology \_\_\_\_\_ Primary Care \_\_\_\_\_  
 Other (please specify): \_\_\_\_\_

Signature: \_\_\_\_\_ Date: \_\_\_\_\_

**Thank you for completing this questionnaire**

*Online supplements are not copyedited prior to posting.*



### e-Appendix 2.

#### BLACK WOMEN'S HEALTH STUDY SARCOIDOSIS QUESTIONNAIRE FOR PARTICIPANTS

1. What was the approximate date of your first sarcoidosis symptom? \_\_\_\_/\_\_\_\_ (month/year)

Figure 3. What was the approximate date that a doctor diagnosed you with sarcoidosis? \_\_\_\_/\_\_\_\_ (month/year)

8. How were you diagnosed with sarcoidosis? (check all that apply)

Chest X-ray \_\_\_\_ Chest CT \_\_\_\_ Biopsy (site: \_\_\_\_\_) \_\_\_\_ Other: \_\_\_\_\_

9. Are you currently having problems from your sarcoidosis? \_\_\_\_ Yes \_\_\_\_ No

10. What problems, if any \_\_\_\_\_

11. Please indicate all sarcoidosis medications you have used, either currently or in the past (check):

|                                      | <b>Currently<br/>Using</b> | <b>Used In<br/>The<br/>Past</b> |
|--------------------------------------|----------------------------|---------------------------------|
| Prednisone                           | _____                      | _____                           |
| Methotrexate                         | _____                      | _____                           |
| Plaquenil                            | _____                      | _____                           |
| Inhaled Steroid (Flovent, Pulmicort) | _____                      | _____                           |
| Nasal Steroid (Nasonex, Flonase)     | _____                      | _____                           |
| Other: _____                         | _____                      | _____                           |

*Online supplements are not copyedited prior to posting.*

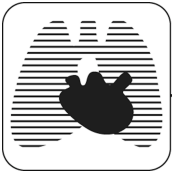

12. Please indicate all the symptoms you have experienced for more than 24 hours, either in the past or currently:

|                                      | <b>At<br/>Diagnosis</b> | <b>In Last<br/>Month</b> | <b>In The Past</b> |
|--------------------------------------|-------------------------|--------------------------|--------------------|
| Shortness of breath                  | _____                   | _____                    | _____              |
| Cough                                | _____                   | _____                    | _____              |
| Chest pain                           | _____                   | _____                    | _____              |
| Fatigue/generalized weakness         | _____                   | _____                    | _____              |
| Palpitations                         | _____                   | _____                    | _____              |
| Nasal/Sinus congestion               | _____                   | _____                    | _____              |
| Joint pain/Muscle aches              | _____                   | _____                    | _____              |
| Numbness/tingling (arms, legs, face) | _____                   | _____                    | _____              |
| Headaches                            | _____                   | _____                    | _____              |
| Other: _____                         | _____                   | _____                    | _____              |

13. Have any of the following family members been diagnosed with sarcoidosis?

Mother: \_\_\_ Father: \_\_\_ Sister: \_\_\_ Brother: \_\_\_ Other family member: \_\_\_ (relationship to you: \_\_\_\_\_)

Thank You For Completing This Questionnaire

*Online supplements are not copyedited prior to posting.*
